# Supplementary material for: Kinetic coupling in distal foot joints during walking
Source: Springer Nature journal article supplement (doi:10.1186/s13047-023-00643-x), 2023-01-01

### Knee

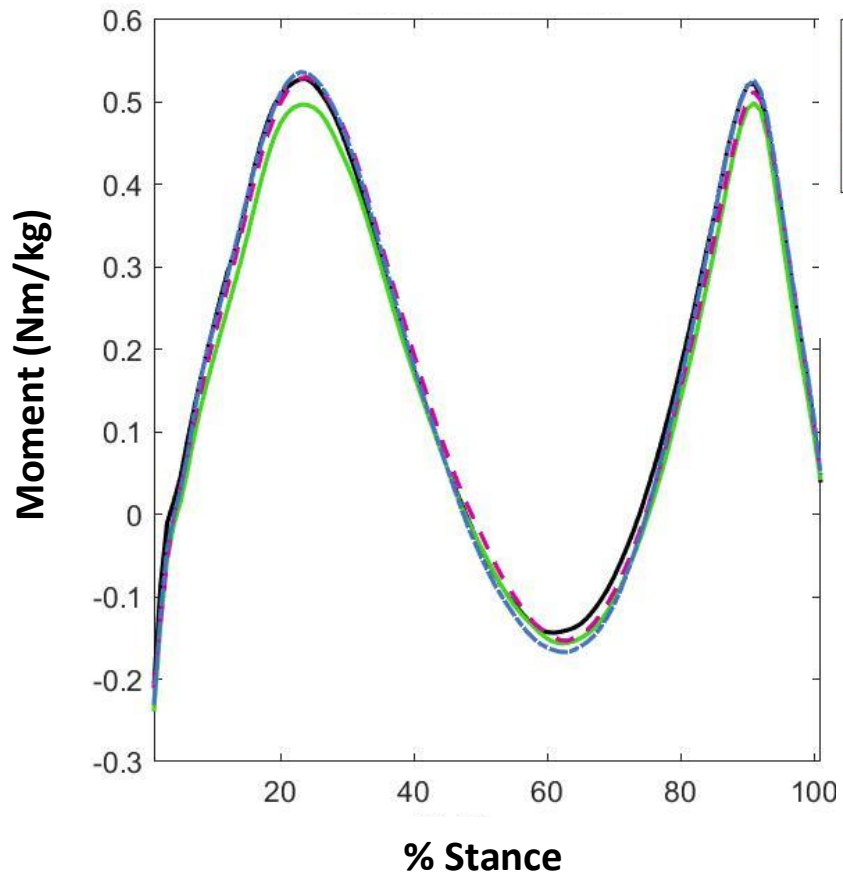

### Hip

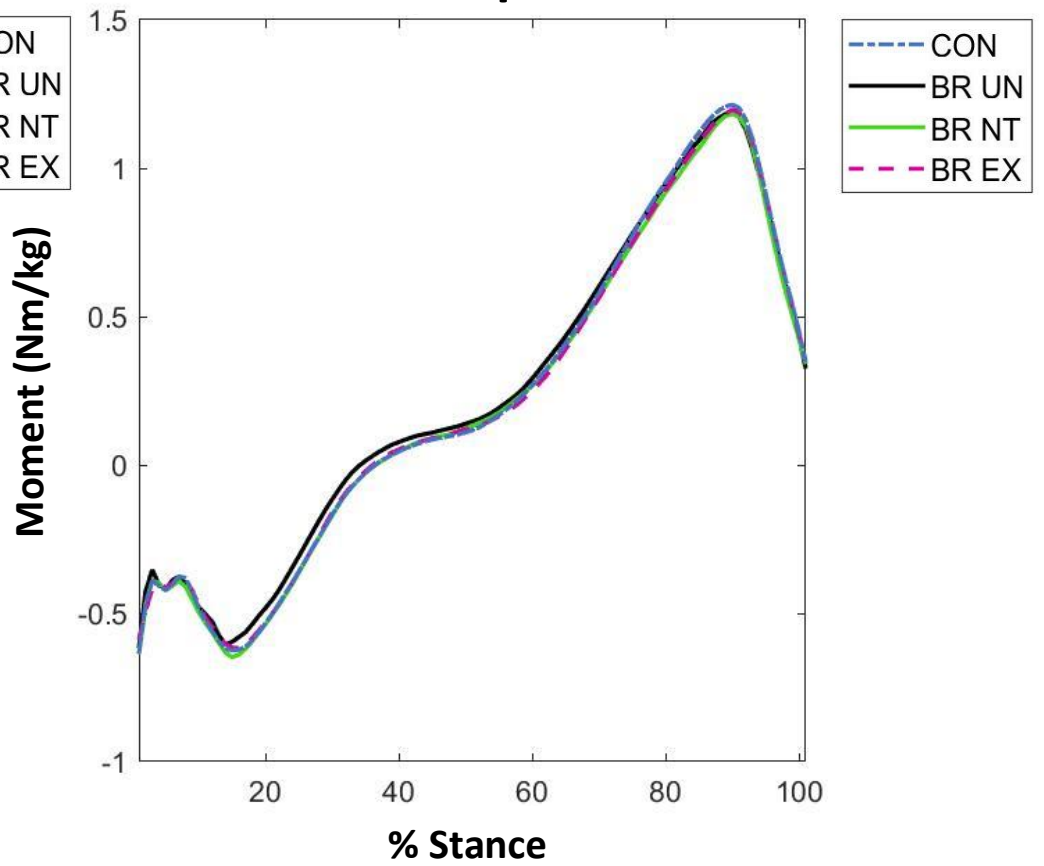

### Knee

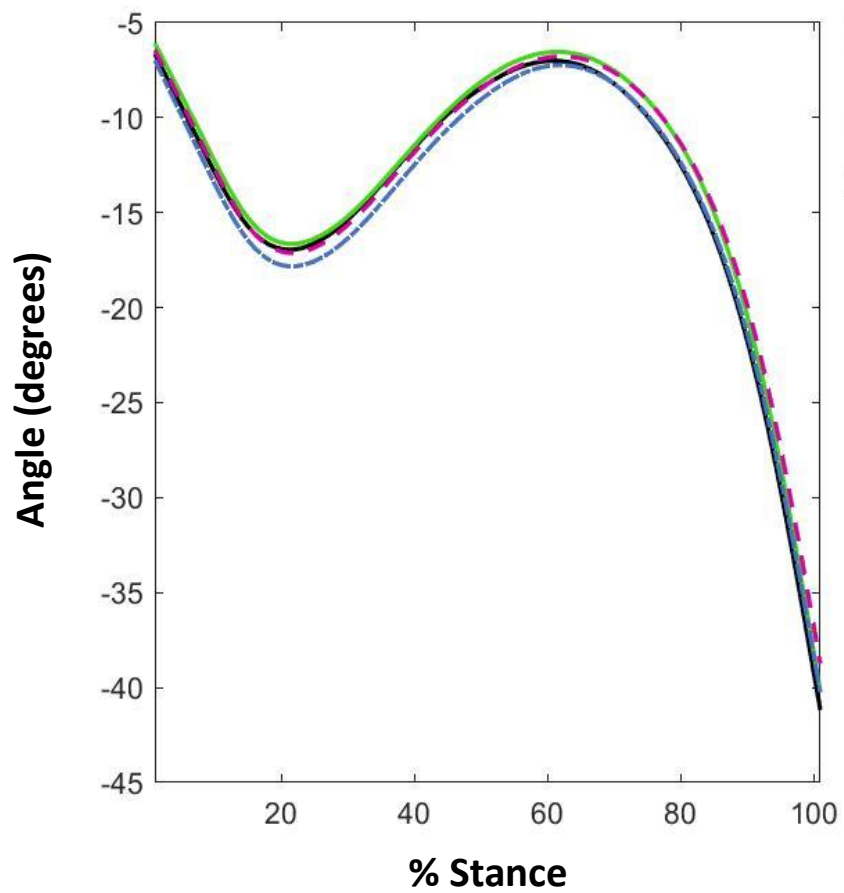

### Hip

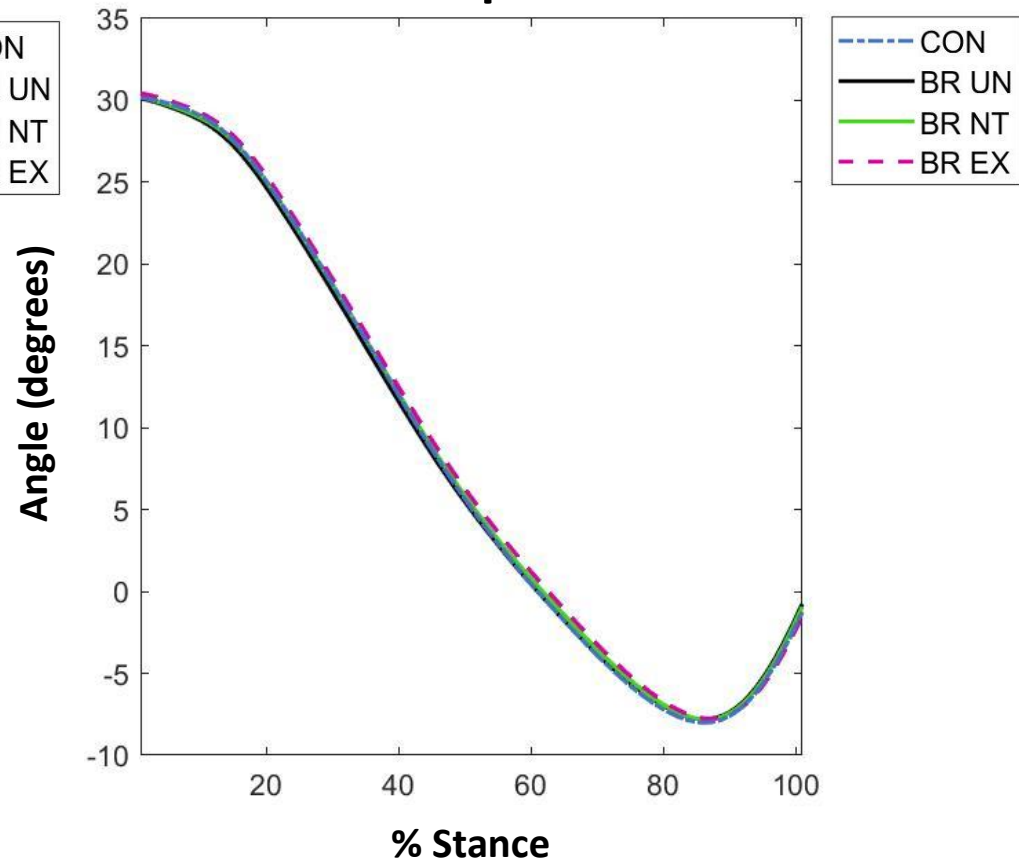

Supplement: MOESM1 [file 25843360]
